# Supplementary material for: Kinetic Analysis of the Interaction of Nicking Endonuclease BspD6I with DNA
Source: MDPI journal article supplement (doi:10.3390/biom11101420), 2021-09-28
Supplement: s1 [file s1]

# Supplementary Materials

**Table S1.** Wavelengths of fluorescence excitation and emission of the reporter groups.

| Fluorophore or Quencher* | Excitation wavelength, nm | Emission wavelength, nm | Light filter |
|--------------------------|---------------------------|-------------------------|--------------|
| Trp                      | 290                       | 345                     | WG-320       |
| FAM                      | 494                       | 525                     | OG-515       |
| BHQ1                     | 534                       | -                       | -            |

\*The wavelength at the maximum of the optical excitation spectrum is given.

**Table S2.** Fluorescence change (rfu) corresponding to the Nt.BspD6I interaction with duplexes of different length in the presence of 10 mM CaCl<sub>2</sub> and 10 mM MgCl<sub>2</sub>.

| Length of DNA duplex, bp | Fluorescence change (rfu) in the presence of | Fluorescence change (rfu) in the presence |
|--------------------------|----------------------------------------------|-------------------------------------------|
|                          | 10 mM CaCl <sub>2</sub>                      | of 10 mM MgCl <sub>2</sub>                |
| 17                       | 0.076                                        | 0.088                                     |
| 19                       | 0.075                                        | 0.111                                     |
| 21                       | 0.099                                        | 0.122                                     |
| 23                       | 0.105                                        | 0.118                                     |
| 26                       | 0.097                                        | 0.112                                     |
| 30                       | 0.156                                        | 0.174                                     |

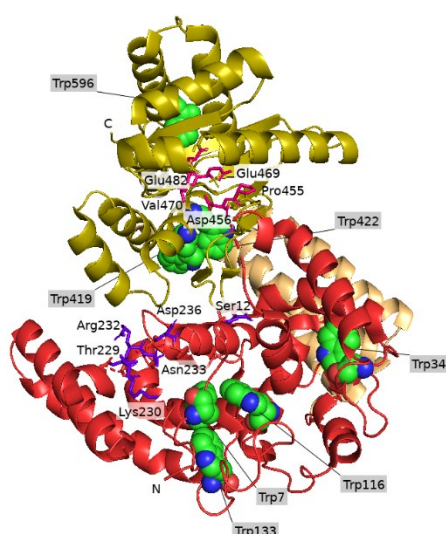

**Figure S1.** Nt.BspD6I structure (Protein Data Bank ID: 2EWF). DNA-binding domain is shown in red colour, linker domain – in peach colour, and catalytic domain – in olive colour. Trp residues are depicted in space-filling representation, the amino acids in a putative DNA-binding site are shown as violet sticks, and the amino acids in a putative catalytic site depicted as pink sticks. Proposed by us according to [Kachalova, G. et al. *J. Mol. Biol.* **2008**, 384, 489–502].

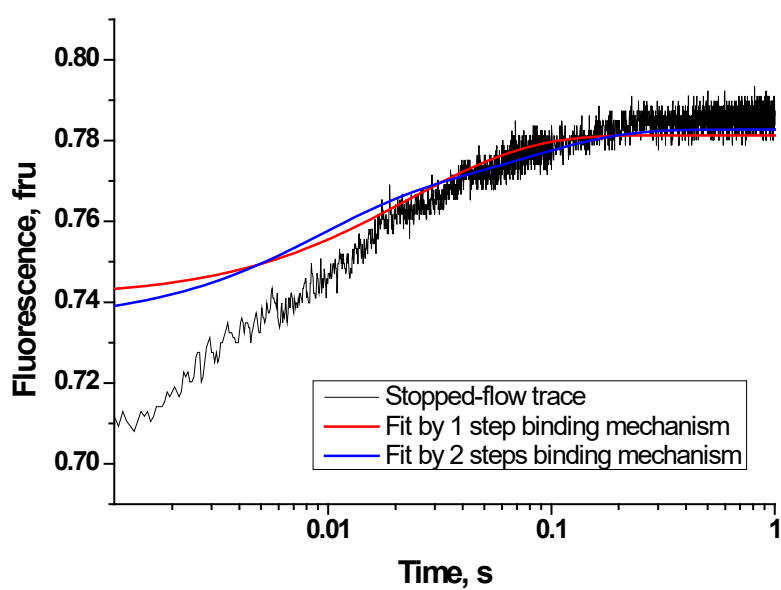

**Figure S2.** Difference between one-step and two-step binding kinetic schemes for the Nt.BspD6I interaction with duplex VI-30 in the absence of divalent metal ions. The fit corresponds to  $[E] = 1.0 \mu\text{M}$  and  $[S] = 0.25 \mu\text{M}$ . For other substrate concentrations, there was no difference between the two kinetic schemes either.

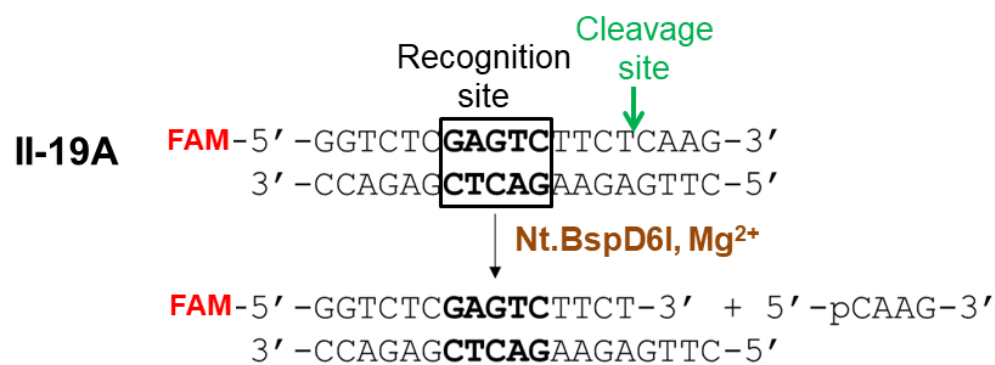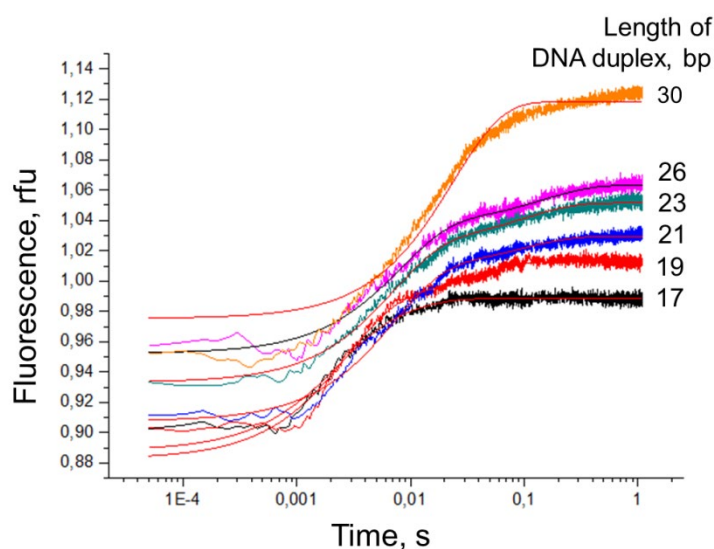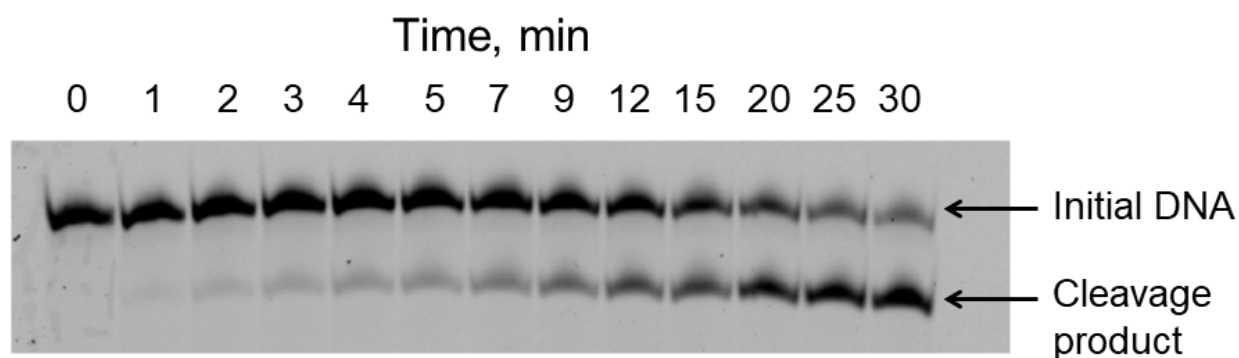

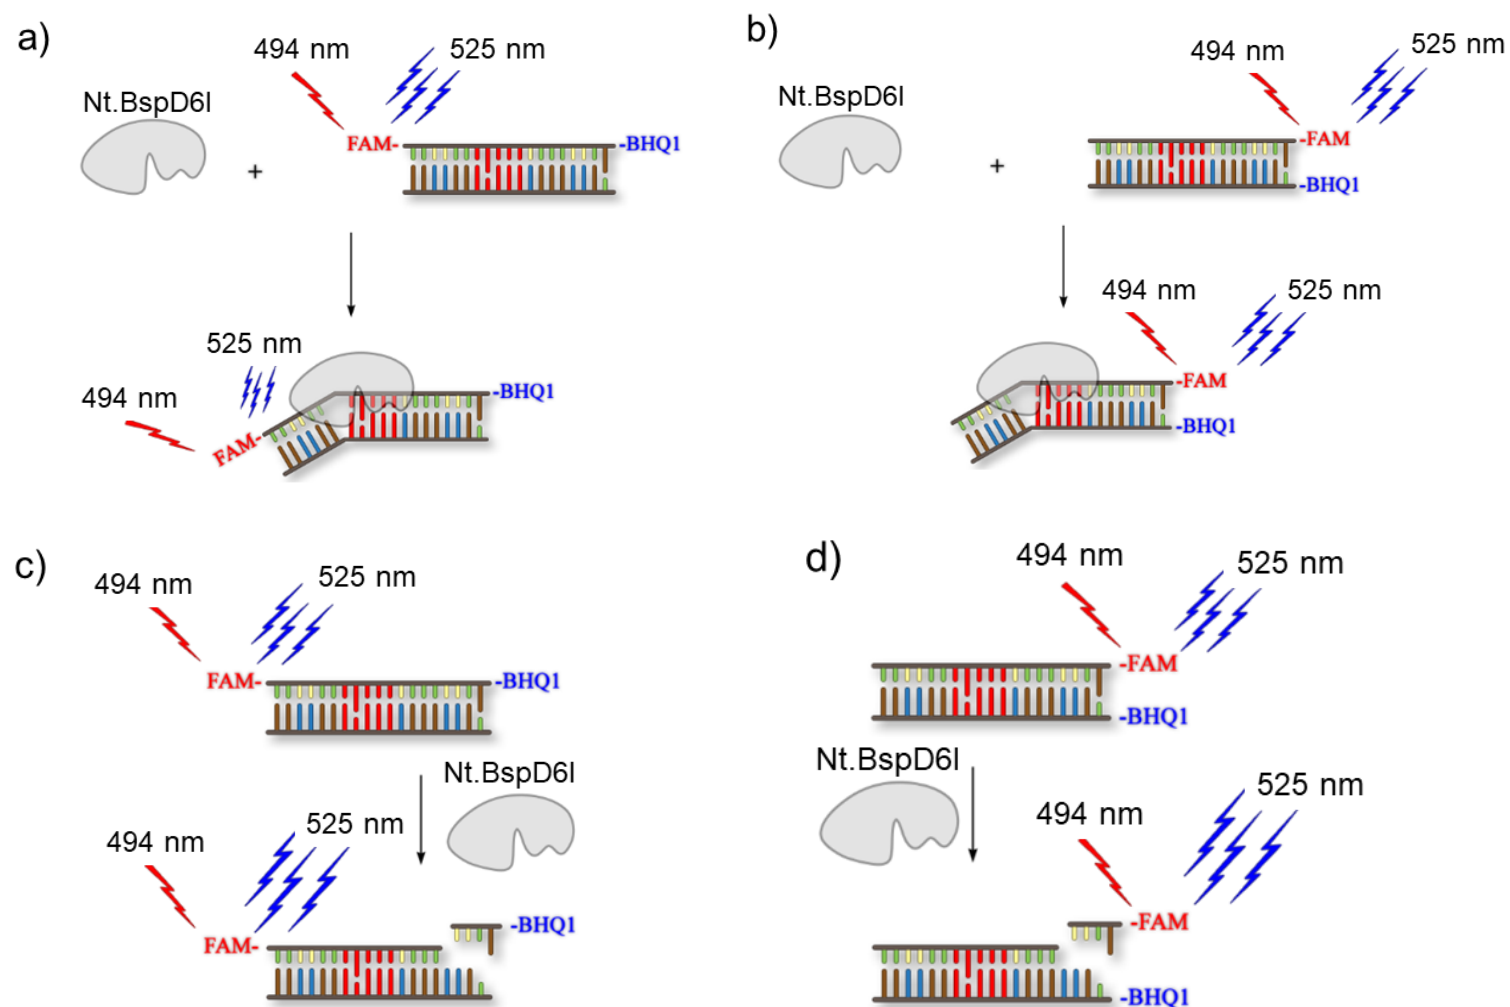

**Figure S5.** Schemes of Nt.BspD6I interaction with DNA duplexes **II-19C** and **II-19D**, illustrating the effect of substrate conformation on fluorescence signal intensity (indicated by blue arrows) of the FAM/BHQ1 pair (fluorophore and fluorescence quencher). Nt.BspD6I's recognition site is highlighted in red. (a) Bending of the **II-19C** substrate leads to a signal intensity decrease due to the approach of the fluorophore to the fluorescence quencher. (b) Nt.BspD6I binding with substrate **II-19D** will not induce a significant change in the fluorescence intensity. (c)–(d) The dissociation of the product of cleavage of DNA duplex **II-19C** or **II-19D** from the complex with NE will enhance the fluorescence intensity

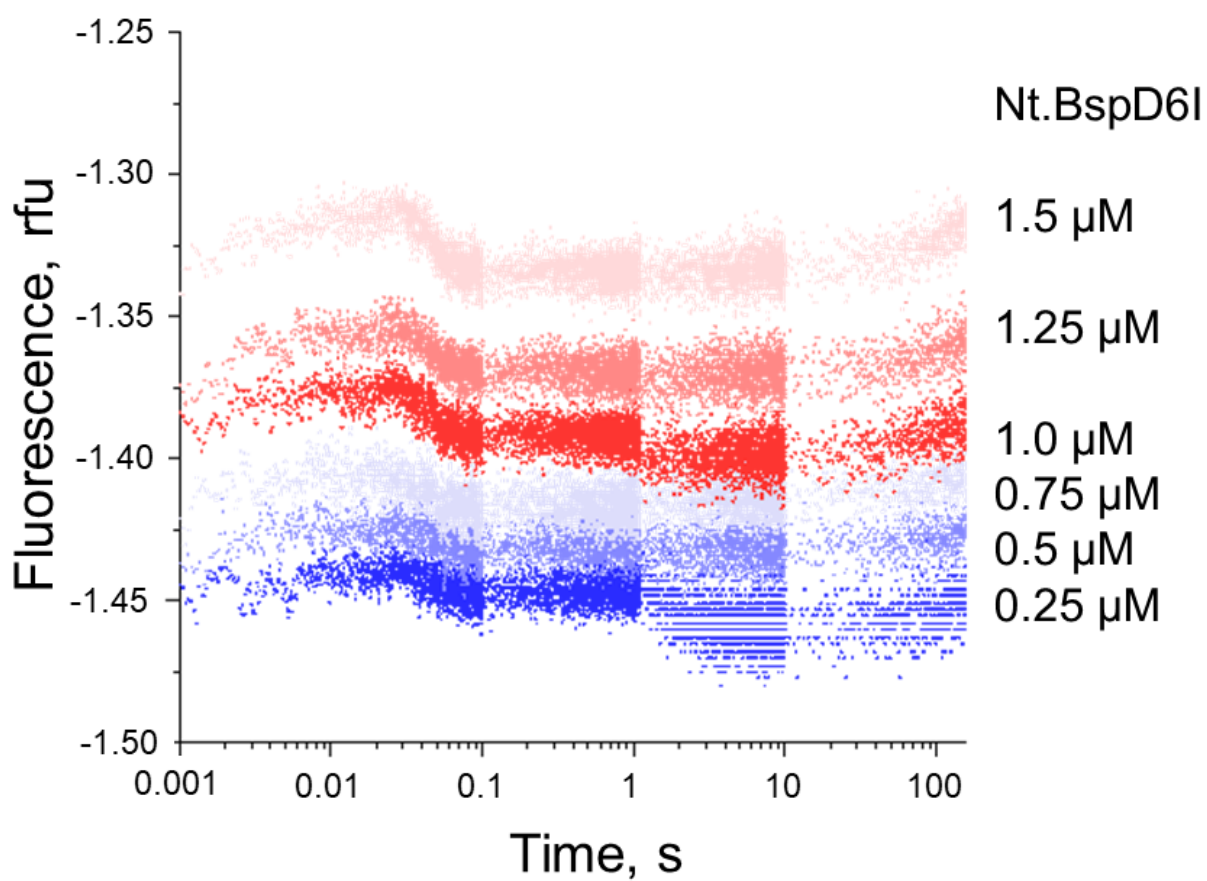

**Figure S6.** Kinetic curves describing the interaction of Nt.BspD6I (concentration is indicated to the right of the curves) with 1  $\mu\text{M}$  duplex II-19D in the presence of 10 mM  $\text{CaCl}_2$ . Rfu: relative fluorescence units.
